# Supplementary material
Source: PubMed Central journal article supplement (PMC8592214)
Supplement: tpmd210113.SD1.pdf [file tpmd210113.SD1.pdf]

| <b>HISTOIRE DE LA GROSSESSE ACTUELLE</b>                                                                                   |                                                                                                                                                                                                                                                                                                         |
|----------------------------------------------------------------------------------------------------------------------------|---------------------------------------------------------------------------------------------------------------------------------------------------------------------------------------------------------------------------------------------------------------------------------------------------------|
| <i>Qui a suivi votre grossesse ?</i>                                                                                       | <input type="checkbox"/> Sage-femme / <input type="checkbox"/> Infirmière / <input type="checkbox"/> Matrone / <input type="checkbox"/> Médecin / <input type="checkbox"/> Pas de suivi<br><input type="checkbox"/> Autre: _____                                                                        |
| <i>Combien de fois avez-vous consulté durant cette grossesse (incluant cette visite s'il s'agit d'une pré-inclusion) ?</i> | <input type="checkbox"/> <input type="checkbox"/>                                                                                                                                                                                                                                                       |
| <i>Avez-vous pris du fer pendant la grossesse ?</i>                                                                        | <input type="checkbox"/> Oui / <input type="checkbox"/> Non / <input type="checkbox"/> Ne sait pas                                                                                                                                                                                                      |
| <i>Avez-vous pris des folates pendant la grossesse ?</i>                                                                   | <input type="checkbox"/> Oui / <input type="checkbox"/> Non / <input type="checkbox"/> Ne sait pas                                                                                                                                                                                                      |
| <i>Le prélèvement vaginal a-t-il été fait (s'il s'agit d'une pré-inclusion) ?</i>                                          | <input type="checkbox"/> Oui / <input type="checkbox"/> Non<br>Si "Oui",<br>Résultat:<br><input type="checkbox"/> Positif pour le streptocoque B<br><input type="checkbox"/> Négatif<br><input type="checkbox"/> Ne sait pas<br><input type="checkbox"/> Positif pour un autre germe ; préciser : _____ |

| <b>MESURE PROTECTION ANTI – PALUSTRE PENDANT LA GROSSESSE</b>                    |                                                                                                                                                                                                                                                                                                                                                                                                                                      |
|----------------------------------------------------------------------------------|--------------------------------------------------------------------------------------------------------------------------------------------------------------------------------------------------------------------------------------------------------------------------------------------------------------------------------------------------------------------------------------------------------------------------------------|
| <i>Avez-vous pris des médicaments contre le paludisme pendant la grossesse ?</i> | <input type="checkbox"/> Oui / <input type="checkbox"/> Non / <input type="checkbox"/> Ne sait pas<br>Si "Oui";<br>Combien de fois? <input type="checkbox"/> <input type="checkbox"/><br>Lequel? _____<br>A quelle date? <input type="checkbox"/> <input type="checkbox"/> / <input type="checkbox"/> <input type="checkbox"/> / <input type="checkbox"/> <input type="checkbox"/> <input type="checkbox"/> <input type="checkbox"/> |
| <i>Avez-vous dormi sous une moustiquaire la nuit dernière ?</i>                  | <input type="checkbox"/> Oui / <input type="checkbox"/> Non                                                                                                                                                                                                                                                                                                                                                                          |
| <b>EXAMEN CLINIQUE</b>                                                           |                                                                                                                                                                                                                                                                                                                                                                                                                                      |
| <i>Périmètre brachial (cm)</i>                                                   | ___ / <input type="checkbox"/> Non mesuré                                                                                                                                                                                                                                                                                                                                                                                            |
| <i>Date prévue d'accouchement (s'il s'agit d'une pré-inclusion)</i>              | <input type="checkbox"/> <input type="checkbox"/> / <input type="checkbox"/> <input type="checkbox"/> / <input type="checkbox"/> <input type="checkbox"/> <input type="checkbox"/> <input type="checkbox"/><br><input type="checkbox"/> Ne sait pas                                                                                                                                                                                  |
